# Supplementary material
Source: Springer Nature journal article supplement (https://www.springermedizin.de/resource/supplementary/13063_2012_1112_MOESM4_ESM.pdf/9619410)
Supplement: MOESM4 [file 9619410]

## Enrollment

**Assessed for eligibility**  
Pregnant women recorded as  
smokers at first antenatal visit  
(n=approximately 8600)

Excluded (n=approximately 7730)

Randomized (n=866)

## Allocation

Allocated to **exercise intervention** (n=433):  
Six weekly sessions of smoking cessation  
support, 14 supervised exercise sessions over  
eight weeks, plus nine physical activity  
consultations over eight weeks.

Allocated to **'Usual care' intervention** (n=433):  
Six weekly sessions of smoking cessation  
support.

## Follow-Up

Primary outcome of continuous smoking  
abstinence assessed at end of pregnancy  
Those lost to follow-up (n=approximately 43)  
will be counted as having resumed smoking.

Primary outcome of continuous smoking  
abstinence assessed at end of pregnancy  
Those lost to follow-up (n=approximately 43)  
will be counted as having resumed smoking.

## Analysis

Analysed (n=433)

Analysed (n=433)
